# Supplementary material for: Trapped lipopolysaccharide and LptD intermediates reveal lipopolysaccharide translocation steps across the Escherichia coli outer membrane
Source: PubMed Central journal article supplement (PMC4493717; doi:10.1038/srep11883), 2015-07-07
Supplement: srep11883-s1.pdf [file srep11883-s1.pdf]

## Supplementary Data

### **Trapped lipopolysaccharide and LptD intermediates reveal lipopolysaccharide translocation steps across the *Escherichia coli* outer membrane**

Xuejun Li<sup>1</sup>, Yinghong Gu<sup>1</sup>, Haohao Dong<sup>2</sup>, Wenjian Wang<sup>3</sup> and Changjiang Dong<sup>1\*</sup>

<sup>1</sup>Biomedical Research Centre, Norwich Medical School, University of East Anglia, Norwich Research Park, Norwich, NR4 7TJ, UK;

<sup>2</sup>Biomedical Sciences Research Complex, School of Chemistry, University of St Andrews, North Haugh, St Andrews, KY16 9ST, UK;

<sup>3</sup>Laboratory of Department of Surgery, the First Affiliated Hospital, Sun Yat-sen University, 58 Zhongshan Road II, Guangzhou, Guangdong, 510080, China.

**Table S1: oligonucleotides used in this study**

| Names    | Sequences                               |
|----------|-----------------------------------------|
| T47Xfor  | GGCGATTAGAACGATCTGCCGGTTACTATCAATG      |
| T47Xbac  | GATCGTTCTAATCGCCTTTTACCAGAGGACGATCGTAGC |
| V52Xfor  | CTGCCGTAGACTATCAATGCCGATAACGCTAAAG      |
| V52Xbac  | TTGATAGTCTACGGCAGATCGTTGGTATCGCCT       |
| I54Xfor  | GGTTACTTAGAATGCCGATAACGCTAAAGGTAAGTAC   |
| I54Xbac  | CGGCATTCTAAGTAACCGGCAGATCGTTGGTATCG     |
| L82Xfor  | AGCCGCTAGCAAGCGGATGAAGTGCAGCTTCATCAGA   |
| L82Xbac  | CGCTTGCTAGCGGCTATTCCCCTGCATAATGTCCA     |
| V104Xfor | CGCACCCTAGGATGCGCTGGGTAATGTGCATTATGA    |
| V104Xbac | CGCATCTCTAGGTGCGTACAGGTTCCGGCTGAC       |
| Y112Xfor | ATGTGCATCTAGGATGACAATCAGGTCATCCTTAAAGGG |
| Y112Xbac | TTGTATCTCTAATGCACATTACCCAGCGCATCGACG    |
| L119Xfor | GGTCATCTAGAAAGGGCCGAAGGGCTGGGCGAA       |
| L119Xbac | GCCCTTTCTAGATGACCTGATTGTCATCATAATGCAC   |
| A126Xfor | GGCTGGTAGAACCTGAACACCAAAGACACGAACG      |
| A126Xbac | TTCAGGTTCTACCAGCCCTTCGGCCCTTTAAGGA      |
| L128Xfor | GCGAACCTAGAACACCAAAGACACGAACGTCTGGGA    |
| L128Xbac | TTGGTGTCTAGTTTCGCCAGCCCTTCGGCCCTTTA     |
| F170Xfor | GGCAGCTAGACCTCCTGTCTGCCTGGCTCCGAT       |
| F170Xbac | GGAGGTCTAGCTGCCGTTTTCCAGAATGGTATAGCG    |
| W180Xfor | CGATACCTAGAGCGTGGTGGGGAGTGAAGTCAT       |
| W180Xbac | CACGCTCTAGGTATCGGAGCCAGGCAGACAGGA       |
| V182Xfor | CTGGAGCTAGGTGGGGAGTGAAGTCATCCATGACCG    |
| V182Xbac | CCCCACCTAGCTCCAGGTATCGGAGCCAGGCAG       |
| H189Xfor | AGTCATCTAGGACCGCGAAGAACAGGTTGCGGAG      |
| H189Xbac | GCGGTCCTAGCTAACTTCACTCCCCACCACGCTC      |
| A196Xfor | ACAGGTTTAGGAGATCTGGAACGCCCGGTTTAAAG     |
| A196Xbac | AGATCTCTAAACCTGTTCTTCGCGGTCATGGAT       |
| I198Xfor | GCGGAGTAGTGAACGCCCGGTTTAAAGTAGGTC       |
| I198Xbac | CGTTCCACTACTCCGCAACCTGTTCTTCGCGGTC      |
| F203Xfor | GCCCGGTAGAAAGTAGGTCCGGTTCCGATCTTTTA     |
| F203Xbac | CCTACTTTCTACCGGGCGTTCAGATCTCCGCAA       |
| L218Xfor | ATTTACAGTAGCCCGTCGGTGACAAGCGTCGCTC      |
| L218Xbac | GACGGGCTACTGTAAATAGGGGCTATAAAAGATCG     |
| V220Xfor | GCTACCCCTAGGGTGACAAGCGTCGCTCAGGTT       |
| V220Xbac | TGTCACCCTAGGGTAGCTGTAAATAGGGGCTATAAA    |
| K223Xfor | CGGTGACTAGCGTCGCTCAGGTTTCTTGATCC        |
| K223Xbac | GCGACGCTAGTCACCGACGGGTAGCTGTAAATA       |
| F228for  | CTCAGGTTAGCTGATCCCGAACGCGAAATACACG      |
| F228bac  | GGATCAGCTAACCTGAGCGACGCTTGTACCGACG      |
| L229for  | CAGGTTTCTAGATCCCGAACGCGAAATACACGACCA    |
| L229bac  | CGGGATCTAGAAACCTGAGCGACGCTTGTACCC       |
| I230for  | GTTTCCTGTAGCCGAACGCGAAATACACGACCAAGAA   |
| I230bac  | GTTTCGGCTACAGGAAACCTGAGCGACGCTTGTCA     |
| N232for  | GATCCCGTAGCGGAAATACACGACCAAGAAGTATTTTCG |

|          |                                         |
|----------|-----------------------------------------|
| N232bac  | TATTTTCGCCTACGGGATCAGGAAACCTGAGCGAC     |
| K234for  | AACGCGTAGTACACGACCAAGAACTATTTTCGAGTTCTA |
| K234bac  | TCGTGTACTACGCGTTTCGGGATCAGGAAACCTG      |
| T236for  | CGAAATACTAGACCAAGAACTATTTTCGAGTTCTACTTA |
| T236bac  | TCTTGGTCTAGTATTTTCGCGTTTCGGGATCAGGAA    |
| T237for  | AATACACGTAGAAGAACTATTTTCGAGTTCTACTTACCG |
| T237bac  | ATAGTTCTTCTACGTGTATTTTCGCGTTTCGGGATCA   |
| K238for  | ACGACCAGAACTATTTTCGAGTTCTACTTACCGTATTA  |
| K238bac  | GAAATAGTTCTAGGTCGTGTATTTTCGCGTTTCGGGA   |
| N239for  | ACCAAGTAGTATTTTCGAGTTCTACTTACCGTATTACTG |
| N239bac  | CTCGAAATACTACTTGGTTCGTGTATTTTCGCGTTC    |
| Y244for  | CGAGTTCAGTTTACCGTATTACTGGAACATCGCGCC    |
| Y244bac  | ACGGTAACTAGAACTCGAAATAGTTCTTGGTTCGTGTA  |
| Y314Xfor | GGTTATTCCTAGTGGCAGCACTCAGGCGTGATGGA     |
| Y314Xbac | GCTGCCACTAGAATAACCAGCGGTGCTTATCGCCC     |
| D330for  | TTAACGTCTAGTACACCAAAGTCAGCGACTCCAGC     |
| D330bac  | TTGGTGTACTAGACGTTAAAACGCCACACCTGATCC    |
| K346for  | CGACAGTTAGTACGGTTCAGTACCGACGGCTACG      |
| K346bac  | GAACCGTACTAAGTGTGAAATCGTTAAAGTAGCTGGAG  |
| T351Xfor | TTCCAGTTAGGACGGCTACGCAACGCAGAAATTCA     |
| T351Xbac | GCCGTCCTAAGTGAACCGTACTTACTGTGCGAAA      |
| D751for  | CGATTTATTAGAACGCGATTGGCTTCAACATTGAG     |
| D751bac  | TCGCGTTCTAATAAATCGCGTGTGTTTATCGTTATC    |
| A753for  | TTATGATAACTAGATTGGCTTCAACATTGAGCTGCG    |
| A753bac  | AGCCAATCTAGTTATCATAAATCGCGTGTGTTTATC    |
| N757for  | GGCTTCCTAGATTGAGCTGCGCGGTTTGAGCTC       |
| N757bac  | AGCTCAATCTAGAAGCCAATCGCGTTATCATAAATCG   |
| S765Xfor | TTTGAGCTAGAACTACGGCCTCGGCACGCAAGAAA     |
| S765Xbac | CCGTAGTTCTAGCTCAAACCGCGCAGCTCAATGT      |
| E773for  | CACGCAATAGATGTTGCGTTTGAACATTCTGCC       |
| E773bac  | CGCAACATCTATTGCGTGCCGAGGCCGTAGTTA       |
| I779Xfor | CGAACCTAGCTGCCGTACCAAAGCTCTATGTAATC     |
| I779Xbac | TACGGCAGCTAGTTTGAACGCAACATTTCTTGCCTG    |

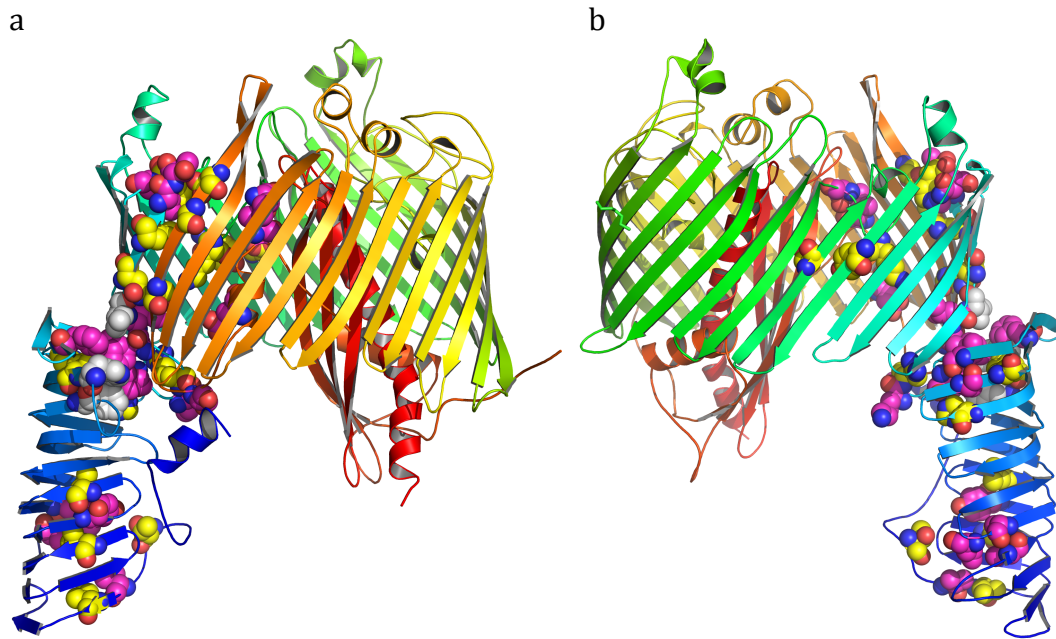

**Figure S1| Residues of *S. typhimurium* LptD are selected for XpBPA incorporation and UV cross-linking.** Residues in magenta can cross-link with LPS. Figure a rotates 180 degree along y-axis to become figure b.

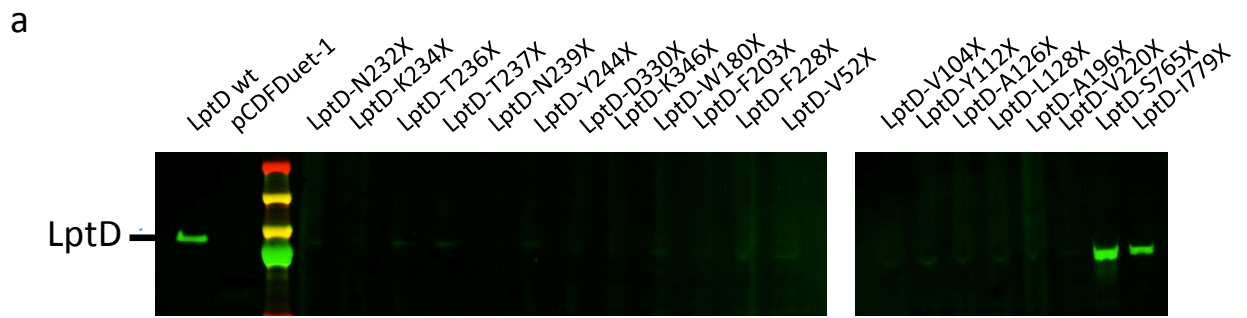

b, with XpBPA

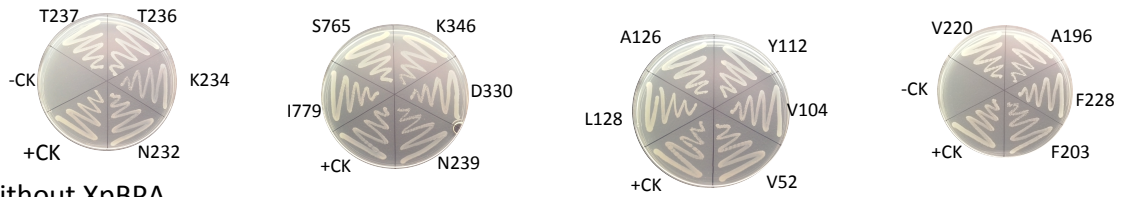

c, without XpBPA

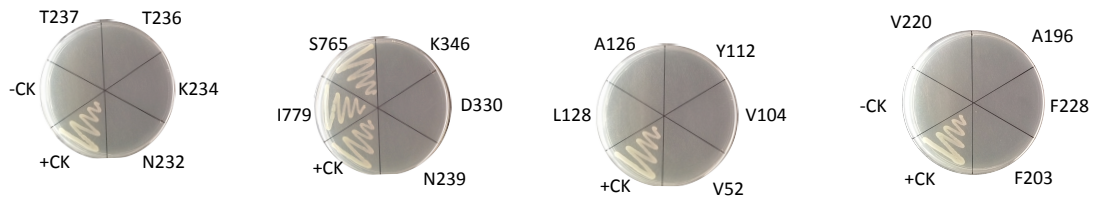

**Figure S2 | Incorporation of pBPA into mutant LptDs could produce a functional LptD** (only some examples are shown here). a, Total cell lysate from BL21(DE3) expressing His-tagged wild type or mutant LptDs were detected with anti-his antibody. Without pBPA, full-length LptDs couldn't be produced (in contrast to Fig2c, 2d, 3c and 3d, where full length LptD variants could be produced in the presence of pBPA). b, LptD depleted AM661 strain expressing mutant LptDs could grow similarly well to that expressing wild type LptD in the presence of pBPA. c, Except for S765 and I779, mutations at other positions resulted in the death of the host AM661 in the absence of pBPA. +CK, positive control (AM661 harbouring plasmid expressing wild type LptD); -CK, negative control (AM661 containing empty plasmid).

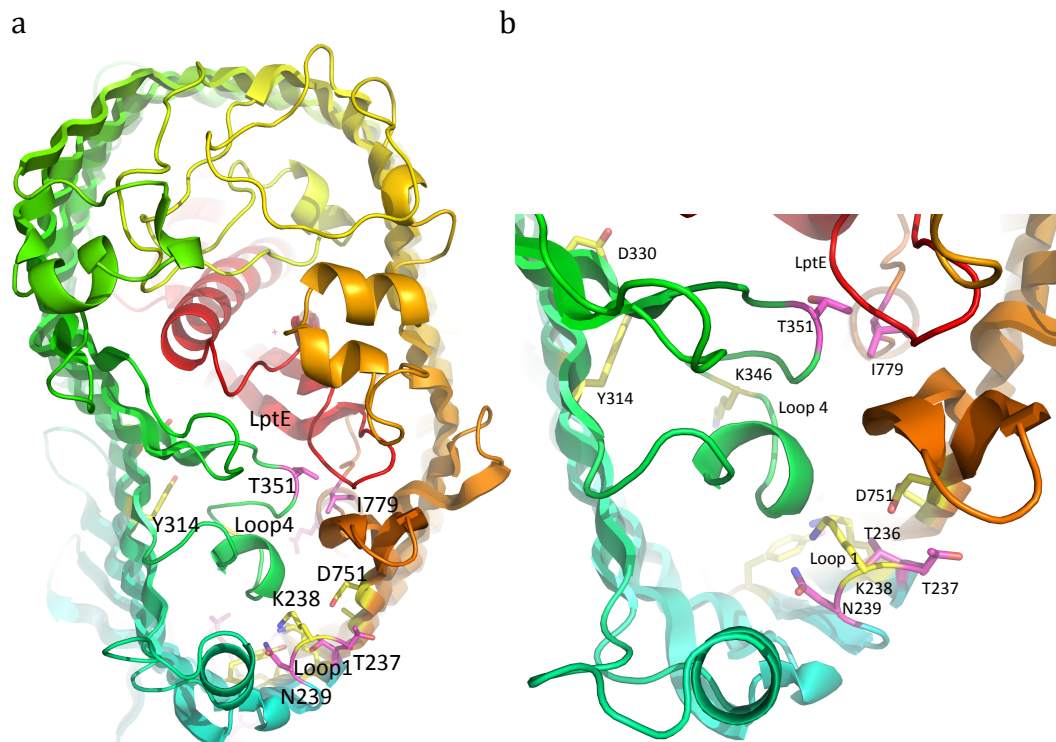

**Figure S3| Extracellular view of LptD/E translocon.** Residues in magenta can cross-link with LPS. Extracellular loop 1 and 4 open the pore for the core oligosaccharide and O-antigen exit from the LptD channel. Figure b is part of figure a.
